# Supplementary material for: In Vitro Glucuronidation and Sulfation of ε-Viniferin, a Resveratrol Dimer, in Humans and Rats
Source: MDPI journal article supplement (doi:10.3390/molecules22050733), 2017-05-03
Supplement: s1 [file s1]

## Supplementary Material: In Vitro Glucuronidation and Sulfation of $\epsilon$ -Viniferin, A Resveratrol Dimer, in Human and Rat

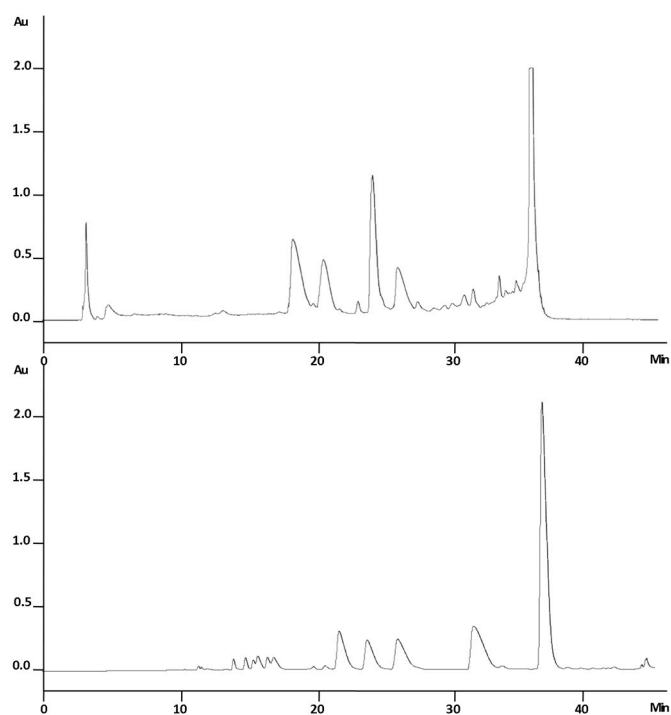

**Figure S1.** Semi-preparative HPLC profile of  $\epsilon$ -viniferin and its metabolites (four glucuronides, upper panel and four sulfates, lower panel), produced by hemi-synthesis.
